# Supplementary material for: Construction of a QSAR Model Based on Flavonoids and Screening of Natural Pancreatic Lipase Inhibitors
Source: MDPI journal article supplement (doi:10.3390/nu15153489), 2023-08-07
Supplement: s1 [file s1]

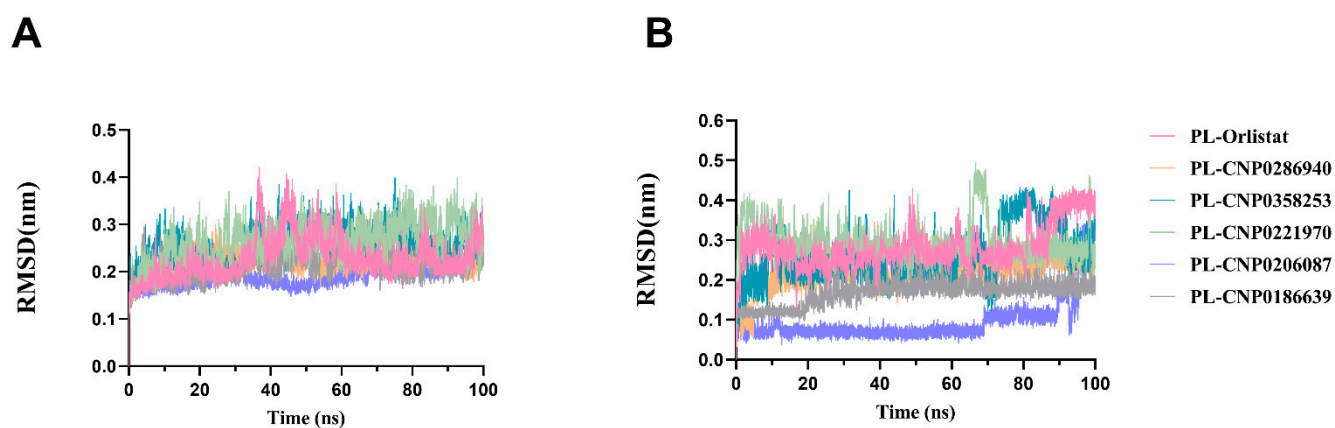

**Figure S1.** RMSD analysis of complex (A) and ligand (B) of PL-Orlistat, PL-CNP0286940, PL-CNP0358253, PL-CNP0221970, PL-CNP0206087 and PL-CNP0186639.

**Table S1.** Reference sources for each compound in the dataset.

| Number | Name of compound                   | References |
|--------|------------------------------------|------------|
| 1      | Daidzein                           | [1]        |
| 2      | genistein                          |            |
| 3      | formononetin                       |            |
| 4      | 3',4',7-Trihydroxyisoflavone       |            |
| 5      | CHEMBL4870006                      |            |
| 6      | 7,8-Dihydroxy-4'-methoxyisoflavone |            |
| 7      | Maduraktermol H                    |            |
| 8      | CHEMBL4878391                      |            |
| 9      | CHEMBL4859886                      |            |
| 10     | 7,3',4'-Trimethoxyisoflavone       |            |
| 11     | wogonin                            | [2]        |

|    |                                                                                                                                   |     |
|----|-----------------------------------------------------------------------------------------------------------------------------------|-----|
| 12 | oroxylin A                                                                                                                        |     |
| 13 | (-)-epiafzelechin 3-O-gallate                                                                                                     |     |
| 14 | (-)-epicatechin 3-O-gallate                                                                                                       |     |
| 15 | (-)-epicatechin 3-O-(3'-O-methyl)gallate                                                                                          |     |
| 16 | (-)-epigallocatechin 3,5-di-O-gallate                                                                                             |     |
| 17 | (-)-epigallocatechin 3-O-p-coumaroate                                                                                             |     |
|    | (-)-epigallocatechin 3-O-gallate                                                                                                  | [3] |
| 18 |                                                                                                                                   |     |
| 19 | (-)-catechin 3-O-gallate                                                                                                          |     |
| 20 | (-)-catechin 3-O-gallate                                                                                                          |     |
| 21 | 8-C-ascorbyl (-)-epigallocatechin                                                                                                 |     |
| 22 | 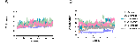 8-C-ascorbyl (-)-epigallocatechin 3-O-gallate |     |
| 23 | tangeretin                                                                                                                        |     |
| 24 | nobiletin                                                                                                                         | [4] |
| 25 | 5-demethyltangeretin                                                                                                              |     |
| 26 | 5-demethylnobiletin                                                                                                               |     |
| 27 | Isoginkgetin                                                                                                                      |     |
| 28 | Bilobetin                                                                                                                         | [5] |
| 29 | Ginkgetin                                                                                                                         |     |
| 30 | Sciadopitysin                                                                                                                     |     |
| 31 | 5,7,3',5'-tetrahydroxyflavanone                                                                                                   |     |
| 32 | 8-prenylnaringenin                                                                                                                | [6] |
| 33 | cudraflavanone D                                                                                                                  |     |

|    |                                                                                    |     |
|----|------------------------------------------------------------------------------------|-----|
| 34 | cudraflavanone A                                                                   |     |
| 35 | 2',5,7-trihydroxy-4,5'-(2,2-dimethylchromeno)-8-(3-hydroxy-3-methylbutyl)flavanone |     |
| 36 | cudracuspiflavanone A                                                              |     |
| 37 | Luteolin                                                                           |     |
| 38 | Kaempferol-3-Orutinoside                                                           |     |
| 39 | Rutin                                                                              | [7] |
| 40 | Quercetin                                                                          |     |

## Reference:

- Cardullo, N.; Muccilli, V.; Pulvirenti, L.; Tringali, C. Natural Isoflavones and Semisynthetic Derivatives as Pancreatic Lipase Inhibitors. *J. Nat. Prod.* **2021**, *84*, 654–665, doi:10.1021/acs.jnatprod.0c01387.
- Wan, L.-H.; Jiang, X.-L.; Liu, Y.-M.; Hu, J.-J.; Liang, J.; Liao, X. Screening of Lipase Inhibitors from *Scutellaria Baicalensis* Extract Using Lipase Immobilized on Magnetic Nanoparticles and Study on the Inhibitory Mechanism. *Anal Bioanal Chem* **2016**, *408*, 2275–2283, doi:10.1007/s00216-016-9320-7.
- Nakai, M.; Fukui, Y.; Asami, S.; Toyoda-Ono, Y.; Iwashita, T.; Shibata, H.; Mitsunaga, T.; Hashimoto, F.; Kiso, Y. Inhibitory Effects of Oolong Tea Polyphenols on Pancreatic Lipase in Vitro. *J. Agric. Food Chem.* **2005**, *53*, 4593–4598, doi:10.1021/jf047814+.
- Huang, X.; Zhu, J.; Wang, L.; Jing, H.; Ma, C.; Kou, X.; Wang, H. Inhibitory Mechanisms and Interaction of Tangeretin, 5-Demethyltangeretin, Nobiletin, and 5-Demethylnobiletin from Citrus Peels on Pancreatic Lipase: Kinetics, Spectroscopies, and Molecular Dynamics Simulation. *International Journal of Biological Macromolecules* **2020**, *164*, 1927–1938, doi:10.1016/j.ijbiomac.2020.07.305.
- Liu, P.-K.; Weng, Z.-M.; Ge, G.-B.; Li, H.-L.; Ding, L.-L.; Dai, Z.-R.; Hou, X.-D.; Leng, Y.-H.; Yu, Y.; Hou, J. Biflavones from *Ginkgo Biloba* as Novel Pancreatic Lipase Inhibitors: Inhibition Potentials and Mechanism. *International Journal of Biological Macromolecules* **2018**, *118*, 2216–2223, doi:10.1016/j.ijbiomac.2018.07.085.
- Jo, Y.H.; Kim, S.B.; Liu, Q.; Lee, J.W.; Hwang, B.Y.; Lee, M.K. Benzylated and Prenylated Flavonoids from the Root Barks of *Cudrania Tricuspidata* with Pancreatic Lipase Inhibitory Activity. *Bioorganic & Medicinal Chemistry Letters* **2015**, *25*, 3455–3457, doi:10.1016/j.bmcl.2015.07.017.
- Habtemariam, S. Antihyperlipidemic Components of *Cassia Auriculata* Aerial Parts: Identification Through *In Vitro* Studies: ANTIHYPERLIPIDEMIC COMPONENTS OF CASSIA AURICULATA AERIAL PARTS. *Phytother. Res.* **2013**, *27*, 152–155, doi:10.1002/ptr.4711.

**Table S2.** Molecular descriptors of potential PL inhibitors screened.

| Name       | MATS1p      | ATSC6e      | GATS2p      | SpMin8_Bhi  | VR2_DzZ     |
|------------|-------------|-------------|-------------|-------------|-------------|
| CNP0186639 | 0.244810577 | 0.796184389 | 1.176948987 | 0.947291746 | 13.86796247 |
| CNP0221970 | 0.244810577 | 1.661881994 | 1.176948987 | 0.968044715 | 12.85192419 |
| CNP0358253 | 0.244810577 | 2.010529781 | 1.176948987 | 0.96789442  | 12.44882367 |
| CNP0286940 | 0.233223414 | 1.584163789 | 1.177845666 | 0.950973695 | 13.17518648 |
| CNP0206087 | 0.199429013 | 1.535463529 | 1.182106191 | 0.953684305 | 13.15952316 |
